# Supplementary material
Source: publisher site journal article supplement (https://www.spandidos-publications.com/6147/downloadSupplementary)

Figure S1. Multivariable analysis of risk factors for respiratory failure mortality. All of the variables were collected on the day of ICU admission. APACHII, acute physiologic and chronic health assessment II; ICU, intensive care unit; FDP, fibrinogen degradation products.

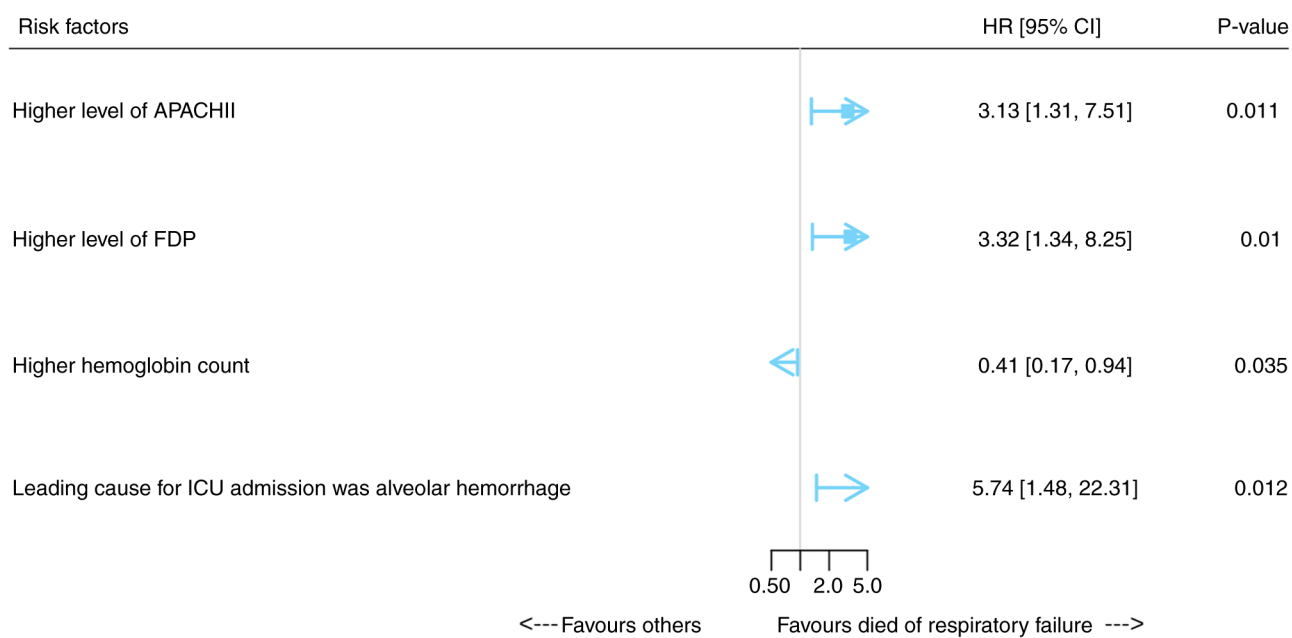

Supplement: Supplementary file 1 [file downloadSupplementary]
